# Supplementary material
Source: PubMed Central journal article supplement (PMC2794121)
Supplement: supp_75_24_7639__1.pdf [file supp_75_24_7639__1.pdf]

Table S1. Database of terminal restriction fragments (TRFs) and sequences for 269 fungal isolates from mature beech maple forests in Northeastern Ohio, USA.

| Isolate ID   | Isolate Access | Location   | Source    | Date Collected | Putative identity based on best UNITE database match |     |           | Terminal Restriction Fragment      |               |                 |                |
|--------------|----------------|------------|-----------|----------------|------------------------------------------------------|-----|-----------|------------------------------------|---------------|-----------------|----------------|
|              |                |            |           |                | Taxa Affinity                                        | %ID | Access #  | Database name                      | AluI<br>58A2F | HaeIII<br>58A2F | HaeIII<br>NLB4 |
| B0739        | FM999657       | Bole Woods | Sporocarp | 8/24/2007      | <i>Agaricus campestris</i>                           | 97  | FJ23223   | <i>Agaricus campestris</i>         | 202           | 469             | 84             |
| B0740        | FM999675       | Bole Woods | Sporocarp | 8/24/2007      | <i>Agaricus macrosporus</i>                          | 99  | AF432878  | <i>Agaricus macrosporus</i>        | 160           | 184             | 84             |
| S0752        | FM999624       | Stebbins   | Sporocarp | 8/27/2007      | <i>Agaricus xanthodermus</i>                         | 98  | EU326208  | <i>Agaricus sp 1</i>               | 297           | 187             | 84             |
| S0784        | FM999640       | Stebbins   | Sporocarp | 10/6/2007      | <i>Agaricus xanthodermus</i>                         | 98  | EU326208  | <i>Agaricus sp 1</i>               | 296           | 187             | 84             |
| S07136       | FM999717       | Stebbins   | Sporocarp | 10/22/2007     | <i>Agaricus xanthodermus</i>                         | 98  | EU326208  | <i>Agaricus sp 2</i>               | 204           | 187             | 84             |
| S0701        | NA             | Stebbins   | Sporocarp | 8/13/2007      | Did not sequence, repeat                             |     |           | <i>Agaricus sp 2</i>               | 202           | 185             | 84             |
| S0705        | NA             | Stebbins   | Sporocarp | 8/15/2007      | Did not sequence, repeat                             |     |           | <i>Agaricus sp 2</i>               | 202           | 185             | 84             |
| S0702        | NA             | Stebbins   | Sporocarp | 8/13/2007      | Did not sequence, repeat                             |     |           | <i>Agaricus sp 2</i>               | 202           | 185             | 84             |
| S0703        | FM999607       | Stebbins   | Sporocarp | 8/13/2007      | <i>Agaricus xanthodermus</i>                         | 98  | EU326208  | <i>Agaricus sp 2</i>               | 202           | 185             | 84             |
| S0755        | FM999626       | Stebbins   | Sporocarp | 8/27/2007      | <i>Amanita flavipes</i>                              | 98  | AB015696  | <i>Amanita flavipes</i>            | 139           | 553             | 551            |
| S06J9        | FM999547       | Stebbins   | Sporocarp | 7/18/2006      | <i>Amanita rubescens</i>                             | 97  | AJ889923  | <i>Amanita flavipes</i>            | 139           | 553             | 550            |
| S0722        | FM999682       | Stebbins   | Sporocarp | 8/23/2007      | <i>Amanita flavipes</i>                              | 98  | AB015696  | <i>Amanita flavipes</i>            | 137           | 551             | 549            |
| S0729        | FM999694       | Stebbins   | Sporocarp | 8/27/2007      | <i>Amanita rubescens</i>                             | 98  | EU19464   | <i>Amanita rubescens 1</i>         | 231           | 553             | 549            |
| S0741        | FM999655       | Stebbins   | Sporocarp | 8/27/2007      | <i>Amanita ibotengutake</i>                          | 93  | AB211056  | <i>Amanita sp 1</i>                | 198           | 584             | 580            |
| S0739        | FM999619       | Stebbins   | Sporocarp | 8/27/2007      | <i>Amanita longistriata</i>                          | 93  | AB015678  | <i>Amanita sp 2</i>                | 196           | 180             | 366            |
| S0724        | FM999614       | Stebbins   | Sporocarp | 8/23/2007      | <i>Amanita rubescens</i>                             | 92  | AJ889923  | <i>Amanita sp 3</i>                | 139           | 466             | 85             |
| S07135       | FM999716       | Stebbins   | Sporocarp | 10/22/2007     | <i>Amanita vaginata</i>                              | 99  | EU19489   | <i>Amanita vaginata</i>            | 210           | 196             | 328            |
| S0780        | NA             | Stebbins   | Sporocarp | 10/6/2007      | Did not sequence, repeat                             |     |           | <i>Amanita virosa</i>              | 438           | 555             | 553            |
| S0760        | FM999697       | Stebbins   | Sporocarp | 9/12/2007      | <i>Amanita virosa</i>                                | 98  | EU909450  | <i>Amanita virosa</i>              | 437           | 553             | 552            |
| S07115       | NA             | Stebbins   | Sporocarp | 10/15/2007     | Did not sequence, repeat                             |     |           | <i>Armillaria sp 1</i>             | 203           | 720             | 713            |
| S07124       | NA             | Stebbins   | Sporocarp | 10/16/2007     | Did not sequence, repeat                             |     |           | <i>Armillaria sp 1</i>             | 203           | 719             | 712            |
| S07108       | FM999651       | Stebbins   | Sporocarp | 10/15/2007     | <i>Armillaria gemina</i>                             | 99  | AY213558  | <i>Armillaria sp 1</i>             | 203           | 720             | 714            |
| S07102       | NA             | Stebbins   | Sporocarp | 10/9/2007      | Did not sequence, repeat                             |     |           | <i>Armillaria sp 1</i>             | 202           | 719             | 712            |
| S0754        | FM999625       | Stebbins   | Sporocarp | 8/27/2007      | <i>Artomyces pyxidatus</i>                           | 99  | AF336145  | <i>Artomyces pyxidatus</i>         | 459           | 249             | 91             |
| B0613        | FM999553       | Bole Woods | Sporocarp | 5/23/2006      | <i>Artomyces pyxidatus</i>                           | 98  | AF336147  | <i>Artomyces pyxidatus</i>         | 458           | 249             | 91             |
| BC063531-18  | FM999593       | Bole Woods | Soil      | 9/1/2006       | Uncultured ectomycorrhiza (Ph)                       | 94  | AY634154  | Black Yeast, Putative Saprobe      | 226           | 159             | 90             |
| S0712        | FM999689       | Stebbins   | Sporocarp | 8/15/2007      | <i>Boletinus merulioides</i>                         | 100 | DQ200922  | <i>Boletinus merulioides</i>       | 466           | 255             | 85             |
| S07100       | NA             | Stebbins   | Sporocarp | 10/9/2007      | Did not sequence, repeat                             |     |           | <i>Boletinus merulioides</i>       | 466           | 255             | 85             |
| S0774        | FM999701       | Stebbins   | Sporocarp | 9/12/2007      | <i>Boletus mirabilis</i>                             | 98  | EU597076  | <i>Boletus mirabilis</i>           | 199           | 254             | 84             |
| S0681        | FM999554       | Stebbins   | Sporocarp | 9/1/2006       | <i>Boletus satanas</i>                               | 95  | UDB000419 | <i>Boletus sp 2</i>                | 350           | 253             | 83             |
| S06J4        | FM999570       | Stebbins   | Sporocarp | 7/18/2006      | <i>Boletus queletii</i>                              | 95  | UDB000760 | <i>Boletus sp 3</i>                | 204           | 189             | 84             |
| SR06T3-171   | FM999526       | Stebbins   | Root tip  | 9/21/2006      | <i>Boletus pulverulentus</i>                         | 97  | UDB000408 | <i>Boletus sp 4</i>                | 200           | 186             | 84             |
| S0771        | NA             | Stebbins   | Sporocarp | 9/12/2007      | Did not sequence, repeat                             |     |           | <i>Boletus sp 5</i>                | 372           | 262             | 84             |
| B0759        | FM999679       | Bole Woods | Sporocarp | 8/28/2007      | <i>Boletus sp.</i>                                   | 92  | EU569238  | <i>Boletus sp 5</i>                | 370           | 261             | 84             |
| S0742        | FM999620       | Stebbins   | Sporocarp | 8/27/2007      | <i>Boletus violaceofuscus</i>                        | 92  | DQ131630  | <i>Boletus sp 6</i>                | 197           | 183             | 81             |
| S0730        | FM999695       | Stebbins   | Sporocarp | 8/27/2007      | <i>Boletus edulis</i>                                | 92  | EU417874  | <i>Boletus sp 7</i>                | 189           | 178             | 40             |
| S0721        | FM999613       | Stebbins   | Sporocarp | 8/23/2007      | <i>Calocera comea</i>                                | 96  | AY789083  | <i>Calocera sp 1</i>               | 193           | 273             | 46             |
| BR06T2-171   | FM999534       | Bole Woods | Root tip  | 9/20/2006      | <i>Cenococcium geophilum</i>                         | 92  | Z48527    | <i>Cenococcium sp 1</i>            | 378           | 243             | 81             |
| BR06T3-51    | FM999605       | Bole Woods | Root tip  | 9/20/2006      | <i>Cenococcium geophilum</i>                         | 97  | DQ474281  | <i>Cenococcium sp 2</i>            | 28            | 366             | 81             |
| SR06T3-161-1 | FM999513       | Stebbins   | Root tip  | 9/21/2006      | Clavulinaceae                                        | 98  | AJ534708  | <i>Clavulina sp 1</i>              | 199           | 203             | 292            |
| SR06T3-161   | NA             | Stebbins   | Root tip  | 9/21/2006      | Clavulinaceae                                        | 98  | AJ534708  | <i>Clavulina sp 1</i>              | 199           | 203             | 292            |
| SR06T3-161-4 | FM999514       | Stebbins   | Root tip  | 9/21/2006      | Clavulinaceae                                        | 98  | AJ534708  | <i>Clavulina sp 1</i>              | 198           | 203             | 292            |
| S0748        | NA             | Stebbins   | Sporocarp | 8/27/2007      | Did not sequence, repeat                             |     |           | <i>Clavulina sp. 2</i>             | 136           | 208             | 293            |
| B0729        | FM999654       | Bole Woods | Sporocarp | 8/22/2007      | <i>Clavulina sp.</i>                                 | 99  | DQ202266  | <i>Clavulina sp. 2</i>             | 135           | 207             | 292            |
| S07147       | NA             | Stebbins   | Sporocarp | 11/13/2007     | Did not sequence, repeat                             |     |           | <i>Clitocybe nebularis</i>         | 201           | 473             | 84             |
| S07123       | FM999711       | Stebbins   | Sporocarp | 10/16/2007     | <i>Clitocybe nebularis</i>                           | 100 | DQ149728  | <i>Clitocybe nebularis</i>         | 201           | 473             | 84             |
| S07126       | FM999713       | Stebbins   | Sporocarp | 10/16/2007     | <i>Clitocybe subditopoda</i>                         | 91  | EU697244  | <i>Clitocybe sp 1</i>              | 154           | 468             | 84             |
| S07127       | FM999714       | Stebbins   | Sporocarp | 10/16/2007     | <i>Clitocybe subditopoda</i>                         | 89  | EU852800  | <i>Clitocybe sp 1</i>              | 154           | 468             | 84             |
| S07146       | FM999690       | Stebbins   | Sporocarp | 11/13/2007     | <i>Collybia cirrhata</i>                             | 95  | AF274382  | <i>Collybia sp 1</i>               | 114           | 269             | 290            |
| S0797        | FM999646       | Stebbins   | Sporocarp | 10/9/2007      | <i>Collybia tuberosa</i>                             | 97  | AF065124  | <i>Collybia tuberosa</i>           | 142           | 269             | 290            |
| S0728        | FM999628       | Stebbins   | Sporocarp | 8/23/2007      | <i>Coprinopsis echinospora</i>                       | 92  | AB071801  | <i>Coprinopsis sp 1</i>            | 434           | 462             | 84             |
| S07134       | FM999720       | Stebbins   | Sporocarp | 10/16/2007     | <i>Coprinus fissolatus</i>                           | 95  | AF345812  | <i>Coprinus sp 1</i>               | 143           | 462             | 84             |
| SR06T3-21-5  | FM999508       | Stebbins   | Root tip  | 9/21/2006      | <i>Cortinarius acutus</i>                            | 93  | AF325578  | <i>Cortinarius sp 1</i>            | 193           | 547             | 533            |
| S0769        | FM999698       | Stebbins   | Sporocarp | 9/12/2007      | <i>Cortinarius sp.</i>                               | 96  | DQ365639  | <i>Cortinarius sp 2</i>            | 142           | 187             | 370            |
| S0783        | NA             | Stebbins   | Sporocarp | 10/6/2007      | Did not sequence, repeat                             |     |           | <i>Cortinarius sp 2</i>            | 142           | 187             | 370            |
| BC063531-28  | FM999601       | Bole Woods | Soil      | 9/1/2006       | <i>Cryptococcus terricola</i>                        | 100 | AF444377  | <i>Cryptococcus terricola</i>      | 206           | 293             | 40             |
| BC063531-2   | FM999587       | Bole Woods | Soil      | 9/1/2006       | <i>Cystofilobasidium capitatum</i>                   | 99  | AF444300  | <i>Cystofilobasidium capitatum</i> | 222           | 291             | 40             |
| BC063531-19  | FM999594       | Bole Woods | Soil      | 9/1/2006       | <i>Helictiales sp.</i>                               | 96  | EF093148  | Dark Septate Endophyte 1           | 134           | 248             | 89             |
| BC063531-4   | FM999588       | Bole Woods | Soil      | 9/1/2006       | uncultured fungus                                    | 99  | DQ093748  | Decaying Root Fungus 1             | 553           | 553             | 548            |
| BC063531-10  | FM999590       | Bole Woods | Soil      | 9/1/2006       | uncultured cf. <i>Tricholoma sp.</i>                 | 98  | AY254876  | Decaying Root Fungus 2             | 435           | 225             | 83             |
| S07125       | FM999712       | Stebbins   | Sporocarp | 10/16/2007     | <i>Nolanea sericea</i>                               | 90  | AF357021  | <i>Entoloma sp 1</i>               | 197           | 553             | 551            |
| S0602        | FM999560       | Stebbins   | Sporocarp | 5/22/2006      | <i>Nolanea sericea</i>                               | 91  | AF357021  | <i>Entoloma sp 1</i>               | 197           | 554             | 552            |
| BR06T3-81    | FM999545       | Bole Woods | Root tip  | 9/20/2006      | <i>Entoloma sp.</i>                                  | 93  | UDB000937 | <i>Entoloma sp 2</i>               | 158           | 189             | 552            |
| S0630-21     | FM999573       | Stebbins   | Sporocarp | 5/23/2006      | <i>Flammula alnicola</i>                             | 97  | AF195588  | <i>Flammula alnicola</i>           | 143           | 187             | 84             |
| S0717        | FM999612       | Stebbins   | Sporocarp | 8/23/2007      | Uncultured ectomycorrhiza                            | 98  | DQ377440  | Funnel Shape Fungi 1               | 198           | 563             | 560            |
| S0779        | FM999638       | Stebbins   | Sporocarp | 10/6/2007      | <i>Galerina autumnalis</i>                           | 97  | AY281020  | <i>Galerina autumnalis</i>         | 450           | 279             | 84             |
| S07149       | NA             | Stebbins   | Sporocarp | 12/12/2007     | Did not sequence, repeat                             |     |           | <i>Galerina autumnalis</i>         | 450           | 279             | 84             |
| S07144       | NA             | Stebbins   | Sporocarp | 11/13/2007     | Did not sequence, repeat                             |     |           | <i>Galerina autumnalis</i>         | 450           | 279             | 84             |
| S0782        | FM999639       | Stebbins   | Sporocarp | 10/6/2007      | <i>Galeropsis desertorum</i>                         | 99  | AY194534  | <i>Galeropsis desertorum</i>       | 153           | 187             | 84             |
| SR06T1-14-4  | FM999498       | Stebbins   | Root tip  | 9/14/2006      | <i>Gymnopus dryophilus</i>                           | 99  | AF505787  | <i>Gymnopus dryophilus 1</i>       | 143           | 353             | 292            |
| S0807        | FM999674       | Stebbins   | Sporocarp | 7/14/2008      | <i>Gymnopus dryophilus</i>                           | 99  | DQ480100  | <i>Gymnopus dryophilus 2</i>       | 140           | 170             | 685            |
| S0801        | FM999670       | Stebbins   | Sporocarp | 6/2/2008       | <i>Gymnopus junquilleus</i>                          | 99  | AY256693  | <i>Gymnopus junquilleus</i>        | 144           | 693             | 686            |
| B0601        | FM999722       | Bole Woods | Sporocarp | 5/23/2006      | <i>Gymnopus dryophilus</i>                           | 99  | AF505787  | <i>Gymnopus sp 1</i>               | 419           | 178             | 142            |
| S0607        | FM999564       | Stebbins   | Sporocarp | 5/22/2006      | Did not sequence, repeat                             |     |           | <i>Gymnopus sp 1</i>               | 419           | 178             | 142            |
| B0704        | FM999692       | Bole Woods | Sporocarp | 7/30/2007      | <i>Gymnopus dichrous</i>                             | 95  | AF505766  | <i>Gymnopus sp 2</i>               | 295           | 648             | 38             |
| S0630-2      | FM999563       | Stebbins   | Sporocarp | 5/23/2006      | <i>Gymnopus dryophilus</i>                           | 99  | AF505787  | <i>Gymnopus sp 3</i>               | 142           | 28              | 0              |
| S0772        | FM999636       | Stebbins   | Sporocarp | 9/12/2007      | <i>Gyroporus castaneus</i>                           | 97  | UDB000651 | <i>Gyroporus castaneus</i>         | 222           | 300             | 40             |
| BC063531-17  | FM999592       | Bole Woods | Soil      | 9/1/2006       | <i>Diaporthe phaseolorum</i>                         | 98  | EF594044  | Hemlock Mycorrhizal Root           | 381           | 496             | 498            |
| S0770        | FM999699       | Stebbins   | Sporocarp | 9/12/2007      | <i>Hericium erinaceum</i>                            | 98  | DQ185926  | <i>Hericium erinaceum</i>          | 448           | 475             | 84             |
| SR06T3-22-3  | FM999511       | Stebbins   | Root tip  | 9/21/2006      | Uncultured ectomycorrhizal                           | 99  | AB219151  | <i>Hyphodiscus sp 1</i>            | 384           | 175             | 241            |
| S07145       | FM999664       | Stebbins   | Sporocarp | 11/13/2007     | <i>Hypholoma sublateritium</i>                       | 99  | AY181349  | <i>Hypholoma sublateritium</i>     | 206           | 477             | 84             |
| S07142       | FM999718       | Stebbins   | Sporocarp | 11/13/2007     | <i>Inocybe johannae</i>                              | 99  | EU326177  | <i>Inocybe johannae</i>            | 222-382       | 292             | 496            |
| S0756        | FM999627       | Stebbins   | Sporocarp | 8/27/2007      | <i>Inocybe rimosa</i>                                | 96  | EU523562  | <i>Inocybe sp 1</i>                | 228           | 543             | 541            |
| S07120       | FM999652       | Stebbins   | Sporocarp | 10/16/2007     | <i>Inocybe sp.</i>                                   | 87  | DQ974806  | <i>Inocybe sp 2</i>                | 418           | 436             | 84             |
| S07110       | FM999706       | Stebbins   | Sporocarp | 10/15/2007     | <i>Inocybe cervicolor</i>                            | 98  | AM882939  | <i>Inocybe sp 2</i>                | 418           | 439             | 84             |
| S07107       | FM999707       | Stebbins   | Sporocarp | 10/9/2007      | <i>Inocybe quietiodor</i>                            | 93  | AM882961  | <i>Inocybe sp 3</i>                | 289           | 266             | 84             |
| S07117       | NA             | Stebbins   | Sporocarp | 10/16/2007     | Did not sequence, repeat                             |     |           | <i>Inocybe sp 4</i>                | 208           | 544             | 540            |
| S0747        | FM999696       | Stebbins   | Sporocarp | 8/27/2007      | <i>Inocybe sp.</i>                                   | 92  | DQ822813  | <i>Inocybe sp 4</i>                | 206           | 543             | 539            |
| S0609        | FM999572       | Stebbins   | Sporocarp | 5/22/2006      | <i>Kuehneromyces mutabilis</i>                       | 93  | AF345807  | <i>Kuehneromyces 1</i>             | 143           | 475             | 84             |
| S07128       | NA             | Stebbins   | Sporocarp | 10/16/2007     | Did not sequence, repeat                             |     |           | <i>Laccaria sp 1</i>               | 152           | 559             | 555            |
| S0790        | FM999642       | Stebbins   | Sporocarp | 10/6/2007      | <i>Laccaria bicolor</i>                              | 94  | AF006598  | <i>Laccaria sp 1</i>               | 152           | 560             | 556            |

Table S1. Database of terminal restriction fragments (TRFs) and sequences for 269 fungal isolates from mature beech maple forests in Northeastern Ohio, USA.

|              |          |             |           |            |                                     |     |           |                                |     |     |     |
|--------------|----------|-------------|-----------|------------|-------------------------------------|-----|-----------|--------------------------------|-----|-----|-----|
| S0765        | FM999634 | Stebbins    | Sporocarp | 9/12/2007  | <i>Laccaria proxima</i>             | 94  | UDB001588 | <i>Laccaria</i> sp 1           | 151 | 560 | 556 |
| S0743        | FM999621 | Stebbins    | Sporocarp | 8/27/2007  | <i>Laccaria amethystina</i>         | 96  | AM113955  | <i>Laccaria</i> sp 2           | 142 | 562 | 559 |
| S0762        | FM999632 | Stebbins    | Sporocarp | 9/12/2007  | <i>Laccaria laccata</i>             | 97  | UDB000104 | <i>Laccaria</i> sp 2           | 141 | 561 | 558 |
| BR06T3-17-B3 | FM999542 | Bole Woods  | Root tip  | 6/21/2006  | <i>Lactarius fluens</i>             | 97  | AJ889961  | <i>Lactarius</i> sp 1          | 220 | 183 | ND  |
| BR06T3-17-C1 | FM999543 | Bole Woods  | Root tip  | 6/21/2006  | <i>Lactarius fluens</i>             | 96  | AJ889961  | <i>Lactarius</i> sp 1          | 220 | 183 | ND  |
| B0754        | FM999659 | Bole Woods  | Sporocarp | 8/28/2007  | <i>Lactarius longisporus</i>        | 90  | DQ421971  | <i>Lactarius</i> sp 2          | 212 | 194 | 36  |
| S0789        | FM999641 | Stebbins    | Sporocarp | 10/6/2007  | <i>Lepista saeva</i>                | 99  | AF241522  | <i>Lepista saeva</i>           | 142 | 476 | 84  |
| B0809        | FM999669 | Bole Woods  | Sporocarp | 9/17/2008  | <i>Lepista saeva</i>                | 99  | AF241522  | <i>Lepista saeva</i>           | 142 | 475 | 83  |
| S0788        | FM999703 | Stebbins    | Sporocarp | 10/6/2007  | <i>Lepista saeva</i>                | 99  | AF241522  | <i>Lepista saeva</i>           | ND  | 476 | 84  |
| S0725        | FM999719 | Stebbins    | Sporocarp | 8/23/2007  | <i>Leucogargaricus crystallifer</i> | 88  | AF482863  | <i>Leucogargaricus</i> sp 1    | 201 | 553 | 551 |
| B07141       | NA       | Bole Woods  | Sporocarp | 11/1/2007  | <i>Leucopaxillus tricolor</i>       | 99  | EU819413  | <i>Leucopaxillus tricolor</i>  | 200 | 505 | 505 |
| S07122       | NA       | Stebbins    | Sporocarp | 10/16/2007 | Did not sequence, repeat            |     |           | <i>Leucophleps</i> sp 1        | 200 | 637 | 631 |
| S07114       | FM999710 | Stebbins    | Sporocarp | 10/15/2007 | <i>Leucophleps spinispora</i>       | 88  | AY621794  | <i>Leucophleps</i> sp 1        | 200 | 637 | 631 |
| S0704        | FM999608 | Stebbins    | Sporocarp | 8/15/2007  | <i>Lycoperdon perlatum</i>          | 98  | DQ112630  | <i>Lycoperdon perlatum</i>     | 141 | 564 | 561 |
| B0807        | FM999681 | Bole Woods  | Sporocarp | 9/17/2008  | <i>Lycoperdon perlatum</i>          | 99  | DQ112630  | <i>Lycoperdon perlatum</i>     | 140 | 562 | 560 |
| S0734        | FM999616 | Stebbins    | Sporocarp | 8/27/2007  | <i>Macrolepiota sp.</i>             | 99  | AY243592  | <i>Macrolepiota</i> sp 1       | 199 | 183 | 84  |
| S07116       | NA       | Stebbins    | Sporocarp | 10/16/2007 | Did not sequence, repeat            |     |           | <i>Macrolepiota</i> sp 1       | 199 | 183 | 84  |
| B0757        | FM999677 | Bole Woods  | Sporocarp | 8/28/2007  | <i>Macrolepiota sp.</i>             | 98  | AY243592  | <i>Macrolepiota</i> sp 2       | 200 | 184 | ND  |
| S0791        | FM999643 | Stebbins    | Sporocarp | 10/9/2007  | <i>Marasmius oreades</i>            | 90  | DQ490641  | <i>Marasmius</i> sp 1          | 142 | 598 | 38  |
| B06P119      | FM999555 | Bole Woods  | Sporocarp | 9/1/2006   | <i>Megacollybia platyphylla</i>     | 99  | DQ249275  | <i>Megacollybia</i> sp 1       | 434 | 550 | 548 |
| B0722        | FM999663 | Bole Woods  | Sporocarp | 8/22/2007  | <i>Megacollybia rodmani</i>         | 99  | EU623762  | <i>Megacollybia</i> sp 1       | 432 | 548 | 545 |
| SR06T2-92-1  | FM999517 | Stebbins    | Root tip  | 9/14/2006  | <i>Meliniomyces bicolor</i>         | 93  | EF093183  | <i>Meliniomyces</i> sp. 1      | 142 | 169 | 80  |
| SR06T2-92-4  | FM999518 | Stebbins    | Root tip  | 9/14/2006  | <i>Meliniomyces bicolor</i>         | 93  | EF093183  | <i>Meliniomyces</i> sp. 1      | 142 | 169 | 80  |
| SR06T3-51-6  | FM999503 | Stebbins    | Root tip  | 9/21/2006  | <i>Meliniomyces bicolor</i>         | 94  | EF093183  | <i>Meliniomyces</i> sp 2       | 378 | 170 | 320 |
| SR06T1-5-8   | FM999580 | Stebbins    | Root tip  | 9/1/2006   | <i>Meliniomyces bicolor</i>         | 95  | EF093183  | <i>Meliniomyces</i> sp. 2      | 379 | 170 | 320 |
| B07102cr     | FM999665 | Bole Woods  | Sporocarp | 10/6/2007  | <i>Morganella pyriformis</i>        | 99  | DQ112557  | <i>Morganella pyriformis</i>   | 144 | 188 | 369 |
| S0785        | NA       | Stebbins    | Sporocarp | 10/6/2007  | Did not sequence, repeat            |     |           | <i>Morganella pyriformis</i>   | 143 | 189 | 369 |
| S06Log       | FM999559 | Stebbins    | Sporocarp | 9/1/2006   | <i>Morganella pyriformis</i>        | 99  | DQ112557  | <i>Morganella pyriformis</i>   | 143 | 185 | 369 |
| S0711        | FM999609 | Stebbins    | Sporocarp | 8/15/2007  | <i>Mycena septentrionalis</i>       | 98  | UDB001611 | <i>Mycena</i> sp 1             | 142 | 564 | 560 |
| B0614        | FM999566 | Bole Woods  | Sporocarp | 5/23/2006  | <i>Mycena septentrionalis</i>       | 99  | UDB001611 | <i>Mycena</i> sp 1             | 142 | 545 | 561 |
| S07111       | FM999708 | Stebbins    | Sporocarp | 10/15/2007 | <i>Mycena hudsoniana</i>            | 95  | EU846300  | <i>Mycena</i> sp 2             | 457 | 487 | 84  |
| S07138       | NA       | Stebbins    | Sporocarp | 10/29/2007 | Did not sequence, repeat            |     |           | <i>Mycena</i> sp 2             | 457 | 487 | 84  |
| B0804        | FM999686 | Bole Woods  | Sporocarp | 5/19/2008  | <i>Mycena</i> sp.                   | 97  | AY805615  | <i>Mycena</i> sp 3             | 154 | 560 | 560 |
| B0803        | FM999685 | Bole Woods  | Sporocarp | 5/19/2008  | <i>Mycena cf. vitilis F15193</i>    | 97  | DQ384588  | <i>Mycena</i> sp 3             | 154 | 560 | 560 |
| S0777        | FM999637 | Stebbins    | Sporocarp | 9/18/2007  | <i>Oudemansiella radicata</i>       | 97  | AF321495  | <i>Oudemansiella radicata</i>  | 144 | 640 | 634 |
| S0733        | FM999615 | Stebbins    | Sporocarp | 8/27/2007  | <i>Panaeolus sphinctrinus</i>       | 90  | DQ182503  | <i>Panaeolus</i> sp 1          | 444 | 183 | 375 |
| B0802        | FM999684 | Bole Woods  | Sporocarp | 5/19/2008  | <i>Peziza phyllogena</i>            | 94  | AY789329  | <i>Peziza</i> sp 1             | 209 | 467 | 88  |
| S07132       | NA       | Stebbins    | Sporocarp | 10/16/2007 | Identified from sporocarp only      |     |           | <i>Phallus impudicus</i>       | 450 | 144 | 40  |
| SR06T1-12-1  | FM999494 | Stebbins    | Root tip  | 9/14/2006  | <i>Piloderma lanatum</i>            | 98  | DQ469288  | <i>Piloderma</i> sp 1          | 163 | 461 | 85  |
| B0712        | FM999662 | Bole Woods  | Sporocarp | 8/16/2007  | <i>Pleurotus sapidus</i>            | 98  | AY540327  | <i>Pleurotus sapidus</i>       | 292 | 461 | 84  |
| S0608        | FM999557 | Stebbins    | Sporocarp | 5/22/2006  | <i>Pluteus petasatus</i>            | 92  | AF085495  | <i>Pluteus</i> sp 1            | 195 | 185 | 351 |
| S0604        | FM999562 | Stebbins    | Sporocarp | 5/22/2006  | <i>Pluteus petasatus</i>            | 92  | AF085495  | <i>Pluteus</i> sp 1            | 194 | 185 | 351 |
| B0701        | NA       | Bole Woods  | Sporocarp | 7/27/2007  | Did not sequence, repeat            |     |           | <i>Pluteus</i> sp 1            | 193 | 183 | 351 |
| S07106       | FM999650 | Stebbins    | Sporocarp | 10/9/2007  | <i>Pluteus cervinus</i>             | 97  | EU486448  | <i>Pluteus</i> sp 1            | 191 | 185 | 351 |
| S0792        | FM999644 | Stebbins    | Sporocarp | 10/9/2007  | <i>Pluteus cervinus</i>             | 96  | EU486448  | <i>Pluteus</i> sp 2            | 196 | 186 | 91  |
| S07105       | FM999649 | Stebbins    | Sporocarp | 10/9/2007  | <i>Polyporus badius</i>             | 100 | AF516559  | <i>Polyporus badius</i>        | 216 | 480 | 84  |
| S0761        | FM999631 | Stebbins    | Sporocarp | 9/12/2007  | <i>Polyporus radicans</i>           | 99  | AF516585  | <i>Polyporus radicans</i>      | 219 | 331 | 219 |
| S0803        | FM999672 | Stebbins    | Sporocarp | 6/16/2008  | <i>Polyporus varius</i>             | 99  | AF516580  | <i>Polyporus</i> sp 1          | 220 | 466 | 84  |
| S07119       | NA       | Stebbins    | Sporocarp | 10/16/2007 | Did not sequence, repeat            |     |           | <i>Polyporus</i> sp 1          | 219 | 466 | 84  |
| S0799        | NA       | Stebbins    | Sporocarp | 10/9/2007  | Did not sequence, repeat            |     |           | <i>Polyporus</i> sp 1          | 217 | 466 | 84  |
| B0611        | FM999565 | Bole Woods  | Sporocarp | 5/23/2006  | <i>Polyporus tuberaster</i>         | 96  | AF516599  | <i>Polyporus</i> sp 1          | 218 | 466 | 84  |
| S0805        | FM999687 | Stebbins    | Sporocarp | 7/14/2008  | <i>Psathyrella fagetophila</i>      | 99  | AM712263  | <i>Psathyrella fagetophila</i> | 488 | 187 | 416 |
| S0603        | FM999561 | Stebbins    | Sporocarp | 5/22/2006  | <i>Psathyrella cf.</i>              | 94  | AY228352  | <i>Psathyrella</i> sp 1        | 168 | 467 | 467 |
| B0602        | FM999574 | Bole Woods  | Sporocarp | 5/23/2006  | <i>Psathyrella cf.</i>              | 93  | AY228352  | <i>Psathyrella</i> sp 1        | 168 | 467 | 467 |
| S0606        | FM999571 | Stebbins    | Sporocarp | 5/22/2006  | <i>Psathyrella cf.</i>              | 94  | AY228352  | <i>Psathyrella</i> sp 2        | 168 | 467 | 41  |
| S0716        | FM999611 | Stebbins    | Sporocarp | 8/23/2007  | <i>Psathyrella gossypina</i>        | 98  | AM712294  | <i>Psathyrella</i> sp 3        | 209 | 468 | 84  |
| S07103       | FM999648 | Stebbins    | Sporocarp | 10/9/2007  | <i>Psathyrella gossypina</i>        | 98  | AM712294  | <i>Psathyrella</i> sp 3        | 209 | 468 | 84  |
| S0768        | FM999635 | Stebbins    | Sporocarp | 9/12/2007  | <i>Psathyrella gossypina</i>        | 95  | AM712294  | <i>Psathyrella</i> sp 3        | 209 | 468 | 84  |
| S0802        | FM999671 | Stebbins    | Sporocarp | 6/16/2008  | <i>Psathyrella gossypina</i>        | 99  | AM712294  | <i>Psathyrella</i> sp 3        | 207 | 466 | 84  |
| BC063531-32  | FM999602 | Bole Woods  | Soil      | 9/1/2006   | mycorrhizal ascomycete              | 93  | AB089663  | Putative Parasitic Fungus      | 276 | 402 | 88  |
| SR06T1-5-11  | FM999582 | Stebbins    | Root tip  | 9/1/2006   | <i>Rhizoscyphus ericae</i>          | 94  | AM084703  | <i>Rhizoscyphus</i> sp 1       | 379 | 169 | 320 |
| SR06T3-51-5  | FM999502 | Stebbins    | Root tip  | 9/21/2006  | <i>Rhizoscyphus ericae</i>          | 94  | AM084704  | <i>Rhizoscyphus</i> sp 1       | 378 | 169 | 320 |
| B0703        | NA       | Bole Woods  | Sporocarp | 7/30/2007  | Did not sequence, repeat            |     |           | <i>Rhodocollybia butyracea</i> | 143 | 695 | 689 |
| B0808        | FM999668 | Bole Woods  | Sporocarp | 9/17/2008  | <i>Rhodocollybia butyracea</i>      | 99  | EU486454  | <i>Rhodocollybia butyracea</i> | 141 | 692 | 686 |
| BC063531-35  | FM999603 | Bole Woods  | Soil      | 9/1/2006   | mycorrhizal ascomycete              | 93  | AB089663  | Root Associated Ascomycota     | 135 | 488 | 487 |
| S0763        | FM999633 | Stebbins    | Sporocarp | 9/12/2007  | <i>Russula chloroides</i>           | 98  | AF418604  | <i>Russula chloroides</i>      | 206 | 516 | 85  |
| BR06T1-22-5  | FM999500 | Bole Woods  | Root tip  | 9/11/2006  | <i>Russula melzeri</i>              | 95  | AY061691  | <i>Russula</i> sp 1            | 220 | 313 | 84  |
| S0726        | NA       | Stebbins    | Sporocarp | 8/23/2007  | Did not sequence, repeat            |     |           | <i>Russula</i> sp 1            | 218 | 311 | 84  |
| S0737        | NA       | Stebbins    | Sporocarp | 8/27/2007  | Did not sequence, repeat            |     |           | <i>Russula</i> sp 10           | 205 | 525 | 84  |
| S0749        | FM999623 | Stebbins    | Sporocarp | 8/27/2007  | <i>Russula xerampelina</i> var.     | 91  | DQ367916  | <i>Russula</i> sp 10           | 205 | 525 | 84  |
| S07129       | NA       | Stebbins    | Sporocarp | 10/16/2007 | Did not sequence, repeat            |     |           | <i>Russula</i> sp 10           | 205 | 525 | 84  |
| C0602        | FM999567 | Carver Pond | Sporocarp | 9/1/2006   | <i>Russula rosea</i>                | 96  | AY061715  | <i>Russula</i> sp 2            | 293 | 222 | 84  |
| S07130       | FM999715 | Stebbins    | Sporocarp | 10/16/2007 | <i>Russula brunneoviolacea</i>      | 92  | AM113956  | <i>Russula</i> sp 3            | 210 | 526 | 84  |
| S07101       | FM999647 | Stebbins    | Sporocarp | 10/9/2007  | <i>Russula brunneoviolacea</i>      | 91  | AM113956  | <i>Russula</i> sp 3            | 209 | 526 | 84  |
| S0758        | FM999630 | Stebbins    | Sporocarp | 8/27/2007  | <i>Russula brunneoviolacea</i>      | 94  | AM113956  | <i>Russula</i> sp 3            | 209 | 526 | 84  |
| SR06T2-141-2 | FM999504 | Stebbins    | Root tip  | 9/21/2006  | <i>Russula nigricans</i>            | 93  | AY228357  | <i>Russula</i> sp 4            | 205 | 490 | 92  |
| SR06T2-141   | NA       | Stebbins    | Root tip  | 9/21/2006  | <i>Russula nigricans</i>            | 94  | AY228357  | <i>Russula</i> sp 4            | 205 | 490 | 92  |
| B0737        | FM999656 | Bole Woods  | Sporocarp | 8/24/2007  | <i>Russula ingwa</i>                | 97  | EU019919  | <i>Russula</i> sp 4            | 204 | 490 | 91  |
| SR06T2-141-4 | FM999506 | Stebbins    | Root tip  | 9/21/2006  | <i>Russula nigricans</i>            | 94  | AY228357  | <i>Russula</i> sp 4            | 204 | 491 | 91  |
| SR06T2-141-3 | FM999505 | Stebbins    | Root tip  | 9/21/2006  | <i>Russula nigricans</i>            | 94  | AY228357  | <i>Russula</i> sp 4            | 204 | 491 | 91  |
| S0794        | NA       | Stebbins    | Sporocarp | 10/9/2007  | Did not sequence, repeat            |     |           | <i>Russula</i> sp 5            | 211 | 531 | 84  |
| SR06T3-22-2  | FM999510 | Stebbins    | Root tip  | 9/21/2006  | <i>Russula</i> sp.                  | 94  | AJ534905  | <i>Russula</i> sp 5            | 211 | 532 | 84  |
| BR06T1-91-3  | FM999515 | Bole Woods  | Root tip  | 9/11/2006  | <i>Russula</i> sp.                  | 94  | AJ534905  | <i>Russula</i> sp 5            | 210 | 530 | 84  |
| BR06T1-91-4  | FM999516 | Bole Woods  | Root tip  | 9/11/2006  | <i>Russula</i> sp.                  | 93  | AJ534905  | <i>Russula</i> sp 5            | 210 | 530 | 84  |
| S0793        | FM999704 | Stebbins    | Sporocarp | 10/9/2007  | <i>Russula</i> sp.                  | 96  | AJ534905  | <i>Russula</i> sp 5            | 210 | 531 | 600 |
| S0795        | NA       | Stebbins    | Sporocarp | 10/9/2007  | Did not sequence, repeat            |     |           | <i>Russula</i> sp 5            | 210 | 531 | 84  |
| SR06T3-22    | NA       | Stebbins    | Root tip  | 9/21/2006  | <i>Russula</i> sp.                  | 94  | AJ534905  | <i>Russula</i> sp 5            | 210 | 531 | 84  |
| SR06T2-111   | FM999531 | Stebbins    | Root tip  | 9/21/2006  | <i>Russula</i> sp.                  | 94  | AJ534905  | <i>Russula</i> sp 5            | 210 | 531 | 84  |
| BR06T2-12-A2 | FM999538 | Bole Woods  | Root tip  | 6/12/2006  | <i>Russula</i> sp.                  | 93  | AJ534905  | <i>Russula</i> sp 5            | 210 | 529 | 84  |
| BR06T2-12-A4 | FM999539 | Bole Woods  | Root tip  | 6/12/2006  | <i>Russula</i> sp.                  | 93  | AJ534905  | <i>Russula</i> sp 5            | 210 | 529 | 84  |
| SR06T2-2-B2  | FM999541 | Stebbins    | Root tip  | 6/8/2006   | <i>Russula</i> sp.                  | 93  | AJ534905  | <i>Russula</i> sp 5            | 210 | 530 | 84  |
| SR06T3-22-5  | FM999512 | Stebbins    | Root tip  | 9/21/2006  | <i>Russula</i> sp.                  | 94  | AJ534905  | <i>Russula</i> sp 5            | 209 | 530 | 85  |
| S0775        | NA       | Stebbins    | Sporocarp | 9/12/2007  | Did not sequence, repeat            |     |           | <i>Russula</i> sp 6            | 216 | 520 | 84  |
| B06T2-1      | FM999604 | Bole Woods  | Sporocarp | 9/11/2006  | <i>Russula</i> sp.                  | 94  | AJ534905  | <i>Russula</i> sp 6            | 215 | 520 | 84  |

Table S1. Database of terminal restriction fragments (TRFs) and sequences for 269 fungal isolates from mature beech maple forests in Northeastern Ohio, USA.

|              |          |                 |           |            |                                                        |     |           |                                 |     |     |     |
|--------------|----------|-----------------|-----------|------------|--------------------------------------------------------|-----|-----------|---------------------------------|-----|-----|-----|
| S0787        | FM999702 | Stebbins        | Sporocarp | 10/6/2007  | <i>Russula</i> sp.                                     | 98  | DQ974761  | <i>Russula</i> sp 7             | 209 | 194 | 84  |
| D0601        | FM999568 | Collected by De | Sporocarp | 9/1/2006   | <i>Russula</i> sp. FH BB.ES                            | 99  | DQ777993  | <i>Russula</i> sp 7             | 209 | 192 | 91  |
| S0776        | NA       | Stebbins        | Sporocarp | 9/12/2007  | Did not sequence, repeat                               |     |           | <i>Russula</i> sp 7             | 208 | 191 | 84  |
| S0757        | FM999683 | Stebbins        | Sporocarp | 8/27/2007  | <i>Russula vesca</i>                                   | 99  | DQ422018  | <i>Russula</i> sp 7             | 207 | 191 | 84  |
| S0764        | NA       | Stebbins        | Sporocarp | 9/12/2007  | Did not sequence, repeat                               |     |           | <i>Russula</i> sp 7             | 207 | 191 | 84  |
| S0706        | NA       | Stebbins        | Sporocarp | 8/15/2007  | Did not sequence, repeat                               |     |           | <i>Russula</i> sp 8             | 454 | 192 | 84  |
| S0753        | NA       | Stebbins        | Sporocarp | 8/27/2007  | Did not sequence, repeat                               |     |           | <i>Russula</i> sp 8             | 453 | 191 | 84  |
| S06J1        | FM999569 | Stebbins        | Sporocarp | 7/18/2006  | <i>Russula ilicis</i>                                  | 88  | AY061682  | <i>Russula</i> sp 8             | 452 | 190 | 91  |
| S0709        | NA       | Stebbins        | Sporocarp | 8/15/2007  | Did not sequence, repeat                               |     |           | <i>Russula</i> sp 8a            | 455 | 482 | 84  |
| S07104       | NA       | Stebbins        | Sporocarp | 10/9/2007  | Did not sequence, repeat                               |     |           | <i>Russula</i> sp 9             | 216 | 475 | 91  |
| S0708        | NA       | Stebbins        | Sporocarp | 8/15/2007  | Did not sequence, repeat                               |     |           | <i>Russula</i> sp 9             | 216 | 473 | 91  |
| S0745        | NA       | Stebbins        | Sporocarp | 8/27/2007  | Did not sequence, repeat                               |     |           | <i>Russula</i> sp 9             | 216 | 473 | 91  |
| S0759        | NA       | Stebbins        | Sporocarp | 8/27/2007  | Did not sequence, repeat                               |     |           | <i>Russula</i> sp 9             | 215 | 473 | 91  |
| S0744        | FM999622 | Stebbins        | Sporocarp | 8/27/2007  | <i>Russula mariae</i>                                  | 96  | EU598199  | <i>Russula</i> sp 9             | 215 | 473 | 91  |
| B06T1-68-1   | NA       | Bole Woods      | Sporocarp | 9/11/2006  | <i>Russula violeipes</i>                               | 93  | AY061726  | <i>Russula</i> sp 9             | 215 | 473 | 91  |
| B06T1-68-2   | FM999501 | Bole Woods      | Sporocarp | 9/11/2006  | <i>Russula violeipes</i>                               | 93  | AY061726  | <i>Russula</i> sp 9             | 215 | 475 | 91  |
| B0758        | FM999676 | Bole Woods      | Sporocarp | 8/28/2007  | <i>Russula nitida</i>                                  | 88  | EU598164  | <i>Russula</i> sp 9             | 214 | 472 | 90  |
| BC063531-27  | FM999600 | Bole Woods      | Soil      | 9/1/2006   | <i>Russula violeipes</i>                               | 95  | AY061726  | <i>Russula</i> sp 9             | 214 | 472 | 91  |
| BC063531-7   | FM999589 | Bole Woods      | Soil      | 9/1/2006   | <i>Russula violeipes</i>                               | 93  | AY061726  | <i>Russula</i> sp 9             | 214 | 473 | 91  |
| BC063531-23  | FM999598 | Bole Woods      | Soil      | 9/1/2006   | <i>Russula violeipes</i>                               | 93  | AY061726  | <i>Russula</i> sp 9             | 214 | 472 | 91  |
| B0801        | FM999680 | Bole Woods      | Sporocarp | 5/19/2008  | <i>Schizophyllum commune</i>                           | 99  | AF348142  | <i>Schizophyllum commune</i>    | 201 | 501 | 84  |
| BR06T2-11    | FM999544 | Bole Woods      | Root tip  | 9/11/2006  | <i>Scleroderma</i> sp.                                 | 98  | EF517491  | <i>Scleroderma</i> sp 1         | 378 | 53  | 273 |
| L0701        | FM999606 | Latern Court    | Sporocarp | 11/8/2007  | <i>Scleroderma</i>                                     | 91  | AB099900  | <i>Scleroderma</i> sp 2         | 162 | 250 | ND  |
| S0720        | FM999693 | Stebbins        | Sporocarp | 8/23/2007  | <i>Scleroderma laeve</i>                               | 99  | EU718117  | <i>Scleroderma</i> sp 3         | 160 | 256 | ND  |
| S0714        | FM999610 | Stebbins        | Sporocarp | 8/15/2007  | <i>Scleroderma cepa</i>                                | 97  | DQ453694  | <i>Scleroderma</i> sp 3         | 160 | 256 | ND  |
| SR06T2-18-2  | FM999577 | Stebbins        | Root tip  | 9/1/2006   | Sebacinaceae-beech interface                           | 97  | AM161532  | <i>Sebacina</i> 1               | 285 | 274 | 271 |
| SR06T2-18-5  | FM999585 | Stebbins        | Root tip  | 9/1/2006   | Sebacinaceae                                           | 98  | DQ420629  | <i>Sebacina</i> 1               | 285 | 274 | 271 |
| SR06T2-18-3  | FM999576 | Stebbins        | Root tip  | 9/1/2006   | Sebacinaceae-beech interface                           | 97  | AM161532  | <i>Sebacina</i> 1               | 284 | 274 | 271 |
| BR06T1-15    | FM999525 | Bole Woods      | Root tip  | 9/11/2006  | <i>Solenopezia solenia</i>                             | 91  | U57991    | <i>Solenopezia</i> sp 1         | 376 | 169 | 319 |
| B06B3        | FM999721 | Bole Woods      | Sporocarp | 7/1/2006   | <i>Strobilomyces floccopus</i>                         | 100 | AY854068  | <i>Strobilomyces floccopus</i>  | 165 | 235 | ND  |
| BR06T3-32    | FM999535 | Bole Woods      | Root tip  | 9/20/2006  | <i>Strobilomyces confusus</i>                          | 90  | DQ407254  | <i>Strobilomyces</i> sp 1       | 333 | 240 | 47  |
| S07143       | NA       | Stebbins        | Sporocarp | 11/13/2007 | Did not sequence, repeat                               |     |           | <i>Tephroclype</i> sp 1         | 143 | 555 | 552 |
| S0796        | FM999645 | Stebbins        | Sporocarp | 10/9/2007  | <i>Tephroclype boudieri</i>                            | 93  | AF357074  | <i>Tephroclype</i> sp 1         | 142 | 555 | 551 |
| SR06T1-12-6  | FM999496 | Stebbins        | Root tip  | 9/14/2006  | <i>Thelephoraceae</i>                                  | 95  | AJ893339  | <i>Tomentella</i> sp 1          | 160 | 92  | 379 |
| SR06T1-12-4  | FM999495 | Stebbins        | Root tip  | 9/14/2006  | <i>Thelephoraceae</i>                                  | 95  | AJ893339  | <i>Tomentella</i> sp 1          | 159 | 92  | 379 |
| SR06T1-14    | NA       | Stebbins        | Root tip  | 9/14/2006  | <i>Thelephoraceae</i>                                  | 95  | AJ893339  | <i>Tomentella</i> sp 1          | 159 | 90  | 387 |
| SR06T1-12    | NA       | Stebbins        | Root tip  | 9/14/2006  | <i>Thelephoraceae</i>                                  | 95  | AJ893339  | <i>Tomentella</i> sp 1          | 159 | 92  | 387 |
| SR06T3-21-6  | FM999509 | Stebbins        | Root tip  | 9/21/2006  | <i>Thelephoraceae</i>                                  | 95  | AJ893339  | <i>Tomentella</i> sp 1          | 158 | 92  | 381 |
| SR06T3-21-4  | FM999507 | Stebbins        | Root tip  | 9/21/2006  | <i>Thelephoraceae</i>                                  | 95  | AJ893339  | <i>Tomentella</i> sp 1          | 158 | 92  | 382 |
| SR06T1-14-2  | FM999497 | Stebbins        | Root tip  | 9/14/2006  | <i>Thelephoraceae</i>                                  | 95  | AJ893339  | <i>Tomentella</i> sp 1          | 158 | 89  | 379 |
| SR06T1-14-5  | FM999499 | Stebbins        | Root tip  | 9/14/2006  | <i>Thelephoraceae</i>                                  | 95  | AJ893339  | <i>Tomentella</i> sp 1          | 158 | 89  | 383 |
| SR06T2-18-7  | FM999584 | Stebbins        | Root tip  | 9/1/2006   | <i>Thelephoraceae</i>                                  | 97  | DQ420630  | <i>Tomentella</i> sp 2          | 159 | 183 | 83  |
| SR06T2-19-2  | FM999519 | Stebbins        | Root tip  | 9/21/2006  | <i>Thelephoraceae</i>                                  | 97  | DQ420630  | <i>Tomentella</i> sp 2          | 158 | 183 | 83  |
| SR06T2-19-3  | FM999520 | Stebbins        | Root tip  | 9/21/2006  | <i>Thelephoraceae</i>                                  | 98  | DQ420630  | <i>Tomentella</i> sp 2          | 158 | 183 | 83  |
| SR06T2-18-9  | FM999586 | Stebbins        | Root tip  | 9/1/2006   | <i>Thelephoraceae</i>                                  | 95  | DQ420630  | <i>Tomentella</i> sp 2          | 158 | 183 | 83  |
| SR06T2-192   | NA       | Stebbins        | Root tip  | 9/21/2006  | <i>Thelephoraceae</i>                                  | 97  | DQ420630  | <i>Tomentella</i> sp 2          | 158 | 183 | 83  |
| SR06T2-192-4 | FM999521 | Stebbins        | Root tip  | 9/21/2006  | <i>Tomentella</i> sp.                                  | 93  | AJ534912  | <i>Tomentella</i> sp 2          | 157 | 183 | 83  |
| BR06T1-201   | FM999530 | Bole Woods      | Root tip  | 9/11/2006  | <i>Tomentella</i> sp.                                  | 97  | AJ534915  | <i>Tomentella</i> sp 3          | 158 | 183 | 83  |
| BR06T1-191   | FM999532 | Bole Woods      | Root tip  | 9/11/2006  | <i>Tomentella</i> sp.                                  | 96  | AJ534915  | <i>Tomentella</i> sp 3          | 158 | 183 | 83  |
| SR06T1-13    | FM999524 | Stebbins        | Root tip  | 9/14/2006  | <i>Thelephoraceae</i>                                  | 97  | DQ420630  | <i>Tomentella</i> sp 4          | 158 | 183 | 389 |
| BR06T2-131   | FM999533 | Bole Woods      | Root tip  | 9/20/2006  | <i>Tomentella</i> sp.                                  | 93  | AJ534912  | <i>Tomentella</i> sp 4          | 158 | 183 | 388 |
| SR06T2-3-A1  | FM999537 | Stebbins        | Root tip  | 6/8/2006   | <i>Tomentella subilacina</i>                           | 98  | DQ482017  | <i>Tomentella</i> sp 5          | 159 | 183 | 83  |
| BR06T1-11    | FM999523 | Bole Woods      | Root tip  | 9/11/2006  | <i>Tomentella subilacina</i>                           | 98  | DQ482017  | <i>Tomentella</i> sp 5          | 158 | 183 | 83  |
| BR06T1-51    | FM999528 | Bole Woods      | Root tip  | 9/11/2006  | <i>Tomentella subilacina</i>                           | 98  | DQ482017  | <i>Tomentella</i> sp 5          | 158 | 183 | 83  |
| BR06T3-17-B4 | FM999549 | Bole Woods      | Root tip  | 6/21/2006  | <i>Tomentella</i> sp.                                  | 94  | U83482    | <i>Tomentella</i> sp 6          | 159 | 183 | 83  |
| BR06T3-18-A1 | FM999551 | Bole Woods      | Root tip  | 6/21/2006  | <i>Tomentella</i> sp.                                  | 94  | U83482    | <i>Tomentella</i> sp 6          | 159 | 183 | 83  |
| SR06T3-21    | NA       | Stebbins        | Root tip  | 9/21/2006  | <i>Thelephoraceae</i>                                  | 95  | AJ893339  | <i>Tomentella</i> sp 7          | 195 | 204 | 116 |
| SR06T3-181   | FM999527 | Stebbins        | Root tip  | 9/21/2006  | <i>Thelephorales</i> sp.                               | 95  | DQ195591  | <i>Tomentella</i> sp 8          | 158 | 353 | 356 |
| BR06T3-31    | FM999575 | Bole Woods      | Root tip  | 9/20/2006  | <i>Trechispora farinacea</i>                           | 86  | AF347089  | <i>Trechispora</i> sp 1         | 435 | 539 | 538 |
| C0601        | FM999556 | Carver Pond     | Sporocarp | 9/1/2006   | <i>Tremellodendron pallidum</i>                        | 99  | AF384862  | <i>Tremellodendron pallidum</i> | 293 | 283 | 217 |
| B0609        | FM999558 | Bole Woods      | Sporocarp | 7/25/2006  | <i>Tremellodendron pallidum</i>                        | 99  | AF384862  | <i>Tremellodendron pallidum</i> | 292 | 281 | 216 |
| S07148       | FM999691 | Stebbins        | Sporocarp | 12/12/2007 | <i>Tubaria praestans</i>                               | 100 | DQ987911  | <i>Tubaria praestans</i>        | 153 | 557 | 555 |
| BR06T3-163   | FM999536 | Bole Woods      | Root tip  | 9/20/2006  | <i>Tuber</i> sp.                                       | 94  | AJ969615  | <i>Tuber</i> sp. 1              | 288 | 209 | 38  |
| S0738        | FM999629 | Stebbins        | Sporocarp | 8/27/2007  | Uncultured fungus                                      | 89  | EF434125  | Uncultured fungus               | 416 | 186 | 334 |
| SR06T1-5-2   | FM999578 | Stebbins        | Root tip  | 9/1/2006   | Uncultured mycorrhizal fungus                          | 97  | EF195594  | Uncultured mycorrhizal fungus 1 | 277 | 554 | 549 |
| SR06T1-5-15  | FM999583 | Stebbins        | Root tip  | 9/1/2006   | Uncultured mycorrhizal fungus                          | 97  | EF195594  | Uncultured mycorrhizal fungus 1 | 277 | 554 | 548 |
| SR06T1-5-6   | FM999579 | Stebbins        | Root tip  | 9/1/2006   | Uncultured mycorrhizal fungus                          | 97  | EF195594  | Uncultured mycorrhizal fungus 2 | 554 | 554 | 549 |
| SR06T1-5-10  | FM999581 | Stebbins        | Root tip  | 9/1/2006   | Uncultured mycorrhizal fungus                          | 97  | EF195594  | Uncultured mycorrhizal fungus 2 | 553 | 553 | 548 |
| BC063531-22  | FM999597 | Bole Woods      | Soil      | 9/1/2006   | <i>Capronia</i> sp.                                    | 97  | AF284126  | Uncultured Peatland Fungus      | 135 | 254 | 246 |
| BR06T1-94    | FM999529 | Bole Woods      | Root tip  | 9/11/2006  | leaf litter basidiomycete sp.                          | 98  | AF241332  | Unidentified basidiomycete      | 154 | 563 | 549 |
| BC063531-24  | FM999599 | Bole Woods      | Soil      | 9/1/2006   | <i>Phialophora</i> sp.                                 | 91  | AY805586  | Unknown Ericoid Mycorrhiza 1    | 375 | 168 | 40  |
| BC063531-21  | FM999596 | Bole Woods      | Soil      | 9/1/2006   | mycorrhizal sp.                                        | 98  | AF081442  | Unknown Ericoid Mycorrhiza 2    | 141 | 155 | 338 |
| BC063531-20  | FM999595 | Bole Woods      | Soil      | 9/1/2006   | <i>Hygrophorus hedrychii</i>                           | 96  | AY463490  | Unknown Root Fungus 1           | 207 | 335 | 91  |
| BC063531-13  | FM999591 | Bole Woods      | Soil      | 9/1/2006   | uncultured cf. <i>Tricholoma</i> sp.                   | 98  | AY254876  | Unknown Root Fungus 2           | 139 | 402 | 88  |
| B0751        | FM999658 | Bole Woods      | Sporocarp | 8/24/2007  | <i>Xerocomus chrysenteron</i>                          | 97  | DQ533981  | <i>Xerocomus chrysenteron</i>   | 194 | 248 | 40  |
| B0725        | FM999666 | Bole Woods      | Sporocarp | 8/22/2007  | <i>Xerocomus chrysenteron</i>                          | 97  | DQ533981  | <i>Xerocomus chrysenteron</i>   | 194 | 248 | 40  |
| B0755        | NA       | Bole Woods      | Sporocarp | 8/28/2007  | Did not sequence, repeat                               | 97  | DQ533981  | <i>Xerocomus chrysenteron</i>   | 193 | 247 | 40  |
| BR06T3-3-A2  | FM999552 | Bole Woods      | Root tip  | 6/21/2006  | <i>Xerocomus communis</i>                              | 93  | UDB001387 | <i>Xerocomus</i> sp 1           | 370 | 344 | 103 |
| BR06T3-3-B1  | FM999550 | Bole Woods      | Root tip  | 6/21/2006  | <i>Xerocomus communis</i>                              | 92  | UDB001387 | <i>Xerocomus</i> sp 1           | 370 | 344 | 103 |
| S06J6        | FM999546 | Stebbins        | Sporocarp | 7/18/2006  | <i>Xerocomus chrysenteron</i>                          | 96  | DQ822793  | <i>Xerocomus</i> sp 2           | 204 | 188 | 47  |
| S06140-171   | NA       | Stebbins        |           | 9/1/2006   | Unknown-TRFs appear as only fungal peaks in some cores |     |           | Unknown                         | 141 | 172 | 88  |
| S06152-483   | NA       | Stebbins        |           | 9/1/2006   | Unknown-TRFs appear as only fungal peaks in some cores |     |           | Unknown                         | 152 | 483 | 83  |
| S06202-174   | NA       | Stebbins        |           | 9/1/2006   | Unknown-TRFs appear as only fungal peaks in some cores |     |           | Unknown                         | 202 | 174 | 83  |
